# Supplementary material
Source: publisher figshare collection journal article supplement (https://acs.figshare.com/ndownloader/files/3791251)
Supplement: Supplementary file 1 [file 3791251]

**Compact Titanium Oxycarbide: A New Substrate for Quantitative Analysis  
of Molecular Films by Means of Infrared Reflection Absorption  
Spectroscopy**

**SUPPORTING INFORMATION**

Izabella Brand,<sup>1\*</sup> Celine Rüdiger,<sup>2,3</sup> Kurt Hingerl,<sup>4</sup> Engelbert Portenkirchner,<sup>3</sup> Julia Kunze-Liebhäuser,<sup>3\*</sup>

<sup>1</sup> *Department of Chemistry, University of Oldenburg, Carl von Ossietzky Str. 7-9, D-26129 Oldenburg, Germany*

<sup>2</sup> *Physik-Department, Technische Universität München, James-Franck-Str. 1, 85748 Garching, Germany. Current address:* <sup>3</sup>

<sup>3</sup> *Institut für Physikalische Chemie, Leopold-Franzens-Universität Innsbruck, Innrain 52c, A-6020 Innsbruck, Austria*

<sup>4</sup> *Zentrum für Oberflächen- und Nanoanalytik, Universität Linz, Altenbergerstr. 69, A-4040 Linz, Austria*

---

\* To whom correspondence should be addressed: [izabella.brand@uni-oldenburg.de](mailto:izabella.brand@uni-oldenburg.de) (phone: +49-441-3973, Fax: 0049441 798 3979), [Julia.Kunze@uibk.ac.at](mailto:Julia.Kunze@uibk.ac.at) (phone: +43-512-507-58013, Fax: +43-512-507 58199)

### SI. 1 The optical constants of arachidic acid in IR spectral region.

The optical constants of the arachidic acid ( $C_{19}H_{39}COOH$ ) dissolved in  $CCl_4$  were determined from IR transmission measurements. The refractive index ( $n$ ) and extinction coefficient ( $k$ ) are shown in figure SI1.

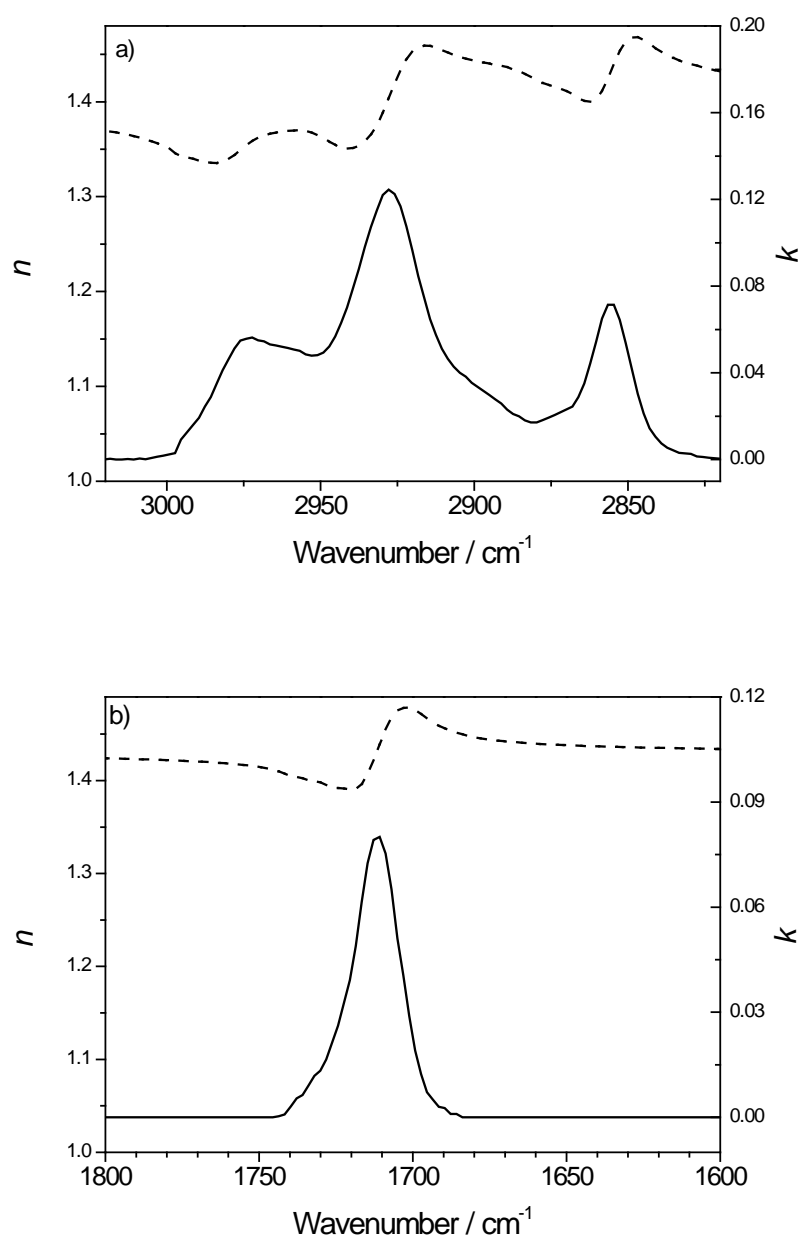

Figure SI 1. The refractive index ( $n$ ; dashed line) and extinction coefficient ( $k$ ; solid line) of arachidic acid in a) CH stretching and b) C=O stretching mode region.

## SI. 2 PM IRRA spectra of Langmuir Blodgett (LB) monolayers of $C_{19}H_{39}COOH$ on Au

Figure SI 2 shows the PM IRRA spectra of LB monolayers of  $C_{19}H_{39}COOH$  on Au and the PM IRRA spectrum calculated from optical constants for randomly distributed  $C_{19}H_{39}COOH$  in a monolayer thick film. In the calculation of the PM IRRA spectrum, the optical constants shown in figure SII were used. The stratified system was composed of air|2.7 nm thick  $C_{19}H_{39}COOH$  film|Au, the angle of incidence was set to  $68^\circ$ .

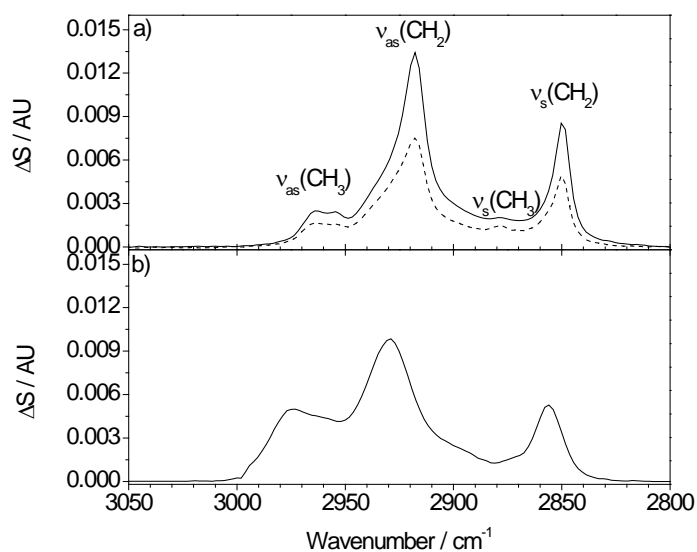

Figure SI 2. PM IRRA spectra of arachidic acid monolayers on Au; a) LB monolayers transferred at a surface pressure equal to 15 (dashed line) and 40 (solid line)  $mN m^{-1}$ , and b) calculated PM IRRA spectrum for randomly distributed molecules in a monolayer thick film.

### SI. 3 Morphology of the $\text{TiO}_x\text{C}_y$ substrate

Scanning electron microscopy (SEM) and atomic force microscopy (AFM) were used to analyze the morphology and surface roughness of the compact  $\text{TiO}_x\text{C}_y$  substrate that was produced by carbothermal reduction of an anodic  $\text{TiO}_2$  film on polycrystalline Ti at  $750\text{ }^\circ\text{C}$  in acetylene/argon atmosphere. SEM micrographs were taken with a field emission SEM based on a GEMINI column in a Zeiss CrossBeam NVision 40 system, where the InLens detector was chosen. The acceleration voltage was set to 4 kV at a working distance of 4 mm. Contact mode AFM was performed with a Veeco Multimode 8 instrument using a SNL-10 probe (silicon tip on silicon nitride cantilever). Analysis of the AFM micrographs was conducted with the NanoScope Analysis 1.5 software. The images were pre-processed with plane fit and zero-order flattening procedures. On these images, roughness analysis was performed.

The SEM image in figure SI 3 shows that the  $\text{TiO}_x\text{C}_y$  surface is composed of irregular grains with an average diameter of  $(16 \pm 7)\ \mu\text{m}$ .

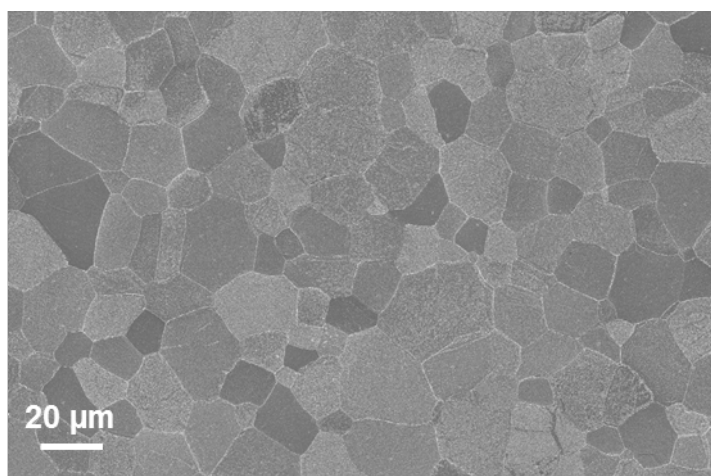

Figure SI 3. SEM image of a  $\text{TiO}_x\text{C}_y$  substrate produced at  $750\text{ }^\circ\text{C}$ .

Figure SI4 depicts a representative AFM image of the  $\text{TiO}_x\text{C}_y$  surface. One can clearly see protruding borders between various grains and that the surface morphology and roughness differs on different grains. Five zones of each  $(15 \times 15)\ \mu\text{m}^2$  were mapped with AFM and the image root mean square height values (rms) were determined. The mean surface roughness calculated from the rms of these zones is equal to  $(25.3 \pm 5.7)\ \text{nm}$ .

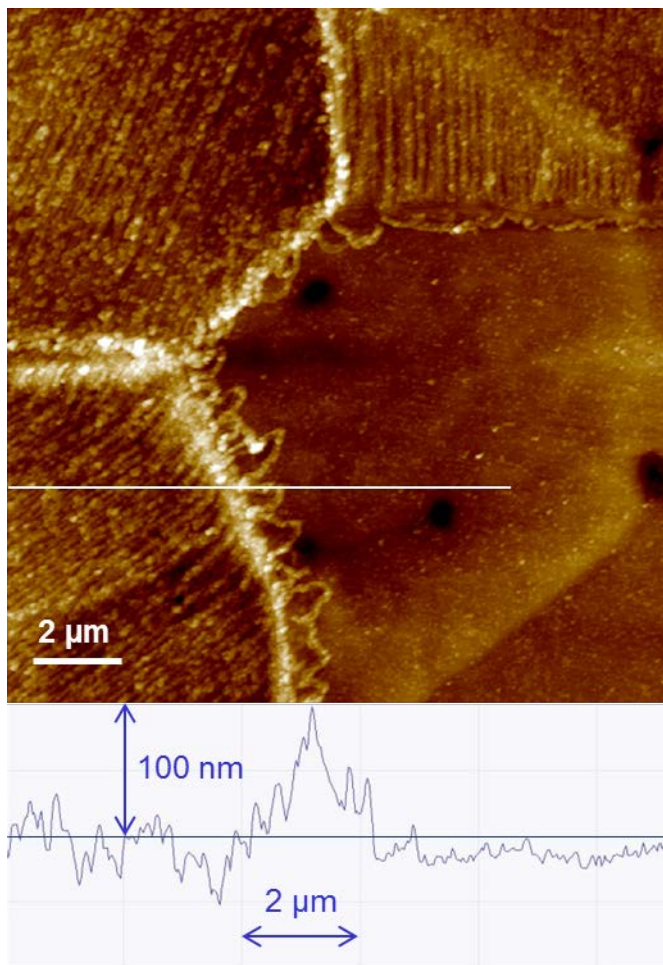

Figure SI4. AFM image of the  $\text{TiO}_x\text{C}_y$  surface with height profile.
